# Supplementary material for: A novel Filamentous Flower mutant suppresses brevipedicellus developmental defects and modulates glucosinolate and auxin levels
Source: PubMed Central journal article supplement (PMC5426679; doi:10.1371/journal.pone.0177045), 2017-05-11
Supplement: pone.0177045.s004.pdf [file pone.0177045.s004.pdf]

Supplementary Table 1: Primer sequences

List of primers used to sequence the *FIL* gene

| Primer name | Strand polarity | Sequence                         | Location vs. start codon |
|-------------|-----------------|----------------------------------|--------------------------|
| FILproFOR   | Plus            | TTCAAATGGTGTTTAGGGTGTAGTTCCGAAAC | -664                     |
| FIL FOR     | Plus            | AAAAGATGTCTATGTCGTCTATGTCCTCC    | -4                       |
| FIL FOR2    | Plus            | TTCGCTTTGTCTTTGCCGTTGAATTC       | 1162                     |
| FIL BACK2   | Minus           | AGACGGTGCATCTCTCAGCTCCTC         | 515                      |
| FIL BACK    | Minus           | GAATCGGTTATATGCGGATGGGACTC       | 1243                     |
| FIL 3' UTR  | Minus           | GGTTTACCTGTTGGGGCATGTTGG         | 1917                     |

List of primers used to genotype/sequence mutant alleles

| Gene        | Primer name                   | Sequence                                        | Mutant notes                                                                                                 |
|-------------|-------------------------------|-------------------------------------------------|--------------------------------------------------------------------------------------------------------------|
| <i>FIL</i>  | FILgenotypeFOR                | GTCAAATACCCATCAATCAATCAAATCC                    | <i>fil-10</i> : C to T change creates HpaII site for CAPS analysis                                           |
|             | FILgenotypeBACK               | AGACGGTGCATCTCTCAGCTCCTC                        |                                                                                                              |
|             | FILgenotypeFOR3               | AGTCCCATCCGCATATAACCGATT                        | <i>fil-4</i> : T to A mutation confirmed by sequencing with FOR3 primer                                      |
|             | FILgenotypeBACK2              | ACCACAACTTTTGGACATGATAAACCC                     |                                                                                                              |
| <i>YAB3</i> | YAB3genotypeFOR<br>YAB3 BACK4 | ACCACATCTTCTCTCCACCGTTC<br>TCTGACCGTCACCGTCTTGA | 509bp amplicon for wildtype                                                                                  |
|             | Ds5-1                         | CCGTTTACCGTTTTGTATATCCCG                        | <i>yab3-2</i> : Paired with YAB3 BACK4 to give ~200bp amplicon for transposon insertion line <i>yab3-2</i> . |
| <i>LAS</i>  | LASgenotype FOR               | ACGGTGTTACAGAGCAGTGTATG                         | <i>las-11</i> : G to A mutation confirmed by sequencing with FOR primer                                      |
|             | LASgenotype BACK              | AGAAGAGGGGACGATTTTGCCAG                         |                                                                                                              |
| <i>AS2</i>  | AS2genotypeFOR                | CAATGGCGGCTTTGTGTAGG                            | <i>as2-101</i> : G to T change creates HpaII site for CAPS analysis                                          |
|             | AS2genotypeBACK               | GATAGTGGTCTCTCACGGCGGT                          |                                                                                                              |
| <i>KAN1</i> | KAN1genotype FOR              | CACAACCGTTCATTCCCTTCC                           | <i>kan1-1</i> : C to T change abolishes Sau3A site for CAPS analysis                                         |
|             | KAN1genotype BACK             | CCCATTCTTCTTCTCCTGACCC                          |                                                                                                              |

|      |                   |                             |                                         |
|------|-------------------|-----------------------------|-----------------------------------------|
|      |                   |                             |                                         |
| KAN2 | KAN2genotype FOR  | GGTTCATCATCTGTGGAAACCGACTG  |                                         |
|      | KAN2genotype BACK | CTCAAGAACTGATTTAGGTGTTGCTCC |                                         |
|      | KAN2sequencing    | CCACCAAACAGTAAACCATCATCG    | <i>kan2-1</i> : Used to sequence mutant |

List of Primers used for QRT-PCR

| Primer name   | Sequence                 | Amplicon size |
|---------------|--------------------------|---------------|
| PP2Ag FOR     | TTCTCGAAACGCTTGATGTG     | 117           |
| PP2Ag BACK    | TTGCATCAGTCATAGGCGAG     |               |
| ACT7 FOR      | GGAGCTGAGAGATTCCGTTG     | 285           |
| ACT7 BACK     | GATTGATCCTCCGATCCAGA     |               |
| UGT74B FOR    | GTGAAAGGCCACGTCGTAAT     | 183           |
| UGT74B BACK   | GAAATCGAATCCATCGGAGA     |               |
| IPMI2 FOR     | GAATCCGACTCTAACGAAGC     | 374           |
| IPMI2 BACK    | GGAAACACCTCTCCTGTAGC     |               |
| AMI FOR       | AGCTGCTCGTCTTGTGGATT     | 164           |
| AMI BACK      | CAAACCATCCAACCTGTGTCG    |               |
| GS-OX1 FOR    | GAGTGGTATGCAACGCTTGA     | 171           |
| GS-OX1 BACK   | GTGGGAGACCATTCTCTGGA     |               |
| GS-OX3 FOR    | GAATGGGACGACGATGAACT     | 165           |
| GS-OX3 BACK   | TTGAAGGCTTGAATCAACC      |               |
| SOT17 FOR     | ACGATGAGAGCTGATCCTTT     | 166           |
| SOT17 BACK    | CTCTGTCTTTCTCCCCTTTG     |               |
| CYP83A FOR    | GAGGAAGAGGCTAGGAGGAT     | 334           |
| CYP83A BACK   | TAGGATCAAGCGTCTCATTG     |               |
| MAM1 FOR      | GTTGCTCTTCTGTGTCCAAA     | 313           |
| MAM1 BACK     | GTTTCCTCATCCACCTCATT     |               |
| CYP71A13 FOR  | ATTCGGATCAGGGAGAAGGATA   | 152           |
| CYP71A13 BACK | CGATACCAATGGCTTCAGTTAGAT |               |
| CYP79B2 FOR   | TACCGGGAAAAGAGGTTGTG     | 197           |
| CYP79B2 BACK  | AGAGATGCTCCGGCAATCTA     |               |
| BCAT4 FOR     | CAAGTTGCTCTTGCCAACAA     | 212           |
| BCAT4 BACK    | GGAAAAGCTCGACGAAACTG     |               |
| CYP81F4 FOR   | TCATCAGAGACCTCCGCTTT     | 261           |
| CYP81F4 BACK  | GTCACGTGGCACATCGTATC     |               |
| IAA2 FOR      | ATCAACCAGCTCACCAAGAACAA  | 179           |
| IAA2 BACK     | CGGGTAATCCAAGACATAGCTC   |               |
| IAA7 FOR      | CTGCTGTTCCCAAGGAGAAG     | 284           |
| IAA7 BACK     | GGCCAATGCATCAGAAAGAT     |               |
| IAA19 FOR     | TGGTGGTGACGCTGAGAAGG     | 146           |
| IAA19 BACK    | TGCTCACTTTCACATACCCTAACC |               |

|                  |                               |                  |
|------------------|-------------------------------|------------------|
| GSTF11 FOR       | AGTATGCGGACCAAGGAACG          | 114              |
| GSTF11 BACK      | CTAAGGGTAGAGCCACAGCG          |                  |
| MYB28 FOR        | ACTGCGATGGACCAACTACC          | 251              |
| MYB28 BACK       | CGACCGTAGGGTTGGAATA           |                  |
| STM FOR          | TTAGGGAGCCTCAAGCAAGA          | 109              |
| STM BACK         | AAGGCCATTTGTAGTGACGG          |                  |
| KNAT2 FOR        | GCTCGACGGAAGACTATTCG          | 127              |
| KNAT2 BACK       | GACAAAGCCGGTAGCGAGTTC         |                  |
| SUR2 FOR         | CGTCATGACTGGACTCGCTA          | 116              |
| SUR2 BACK        | TGGTCACGCCATATCTACCA          |                  |
| TAA1 FOR         | GATGAAGAATCGGTGGGAGA          | 236              |
| TAA1 BACK        | TGACTCGGACATGCTTCTTG          |                  |
| LAX1 FOR         | ATTCGGATCAGTCATCCAGC          | 280              |
| LAX1 BACK        | GGTGGCTCCGGTAAAGTACA          |                  |
| MYROSINASES FOR  | GGACCAGTGATGATAACTAGATGGTTTCT | 247 <sup>1</sup> |
| MYROSINASES BACK | TGGGCGTATTGAGTGACGTAATAGTTG   |                  |
| TGG1 FOR         | GCAGCCAGTTACTACTACCCAAA       | 248              |
| TGG1 BACK        | TTATCCCAAGAGACCAAGC           |                  |
| NITRILASES FOR   | GTTTCATAACGAAGAAGGGCGTG       | 279 <sup>2</sup> |
| NITRILASES BACK  | TGTCGTAACGGGGATGGTTG          |                  |
| YUC1 FOR         | GAACACCGTTCATGTGTTGC          | 206              |
| YUC1 BACK        | GACTTTTGCCGGTGACATTT          |                  |
| YUC6 FOR         | GAAGGCACGACGGAGTATGT          | 228              |
| YUC6 BACK        | AGCACCGAAGTTGCAGAGAT          |                  |

<sup>1</sup>Myrosinase cDNAs (TGG1 and TGG2) were both amplified by this primer set; their sequence lengths and thus melting temperatures were identical.

<sup>2</sup>Nitrilase cDNAs (NIT1, NIT2, and NIT3) were amplified by this primer set; product lengths were identical and the products' melt temperature differed by less than 1°C.

Primers used for multiplex PCR to determine relative DR5 gene copy number in transgenic lines. Annealing was conducted at 58°C.

| Primer name     | Sequence                             | Amplicon size |
|-----------------|--------------------------------------|---------------|
| EGADjunctionFOR | CATGAGCGGAGAATTAAGGGAGTC             | 712bp         |
| GUSgenotypeBACK | GACCCACACTTTGCCGTAATGAGTG            |               |
| AMigenotypeFOR  | GAGTGCACATTGTCTTTAGGATGGTTTGCTCGG    | 306bp         |
| AMigenotypeBACK | TCACCGTTTTACTACAGTGTTGCCTTGATACAGAAC |               |

Primers used to amplify the region of FIL containing the *fil-4* lesion and to examine the splicing defect

| Primer name      | Sequence                    | Amplicon size      |
|------------------|-----------------------------|--------------------|
| FILgenotype FOR3 | AGTCCCATCCGCATATAACCGATT    | 337bp WT           |
| FILgenotypeBACK2 | ACCACAACTTTTGGACATGATAAACCC | 756bp <i>fil-4</i> |
